# Supplementary material
Source: publisher site journal article supplement (https://www.dovepress.com/article/445737)
Supplement: Supplementary file 1 [file get_supplementary_file.php]

1. **
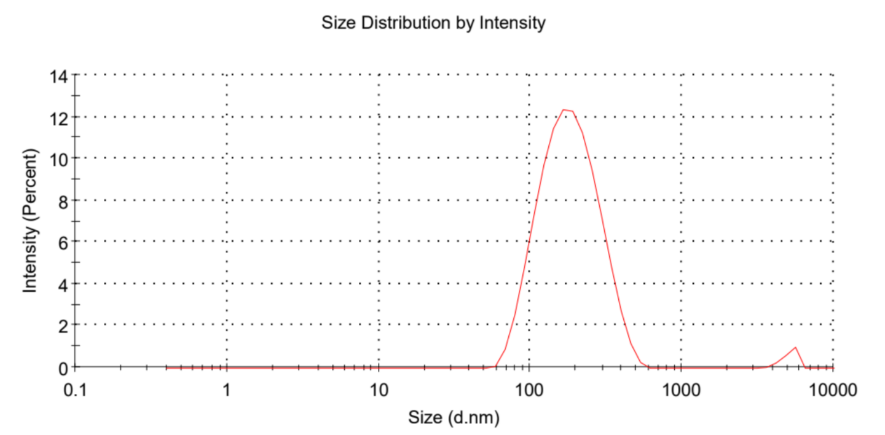

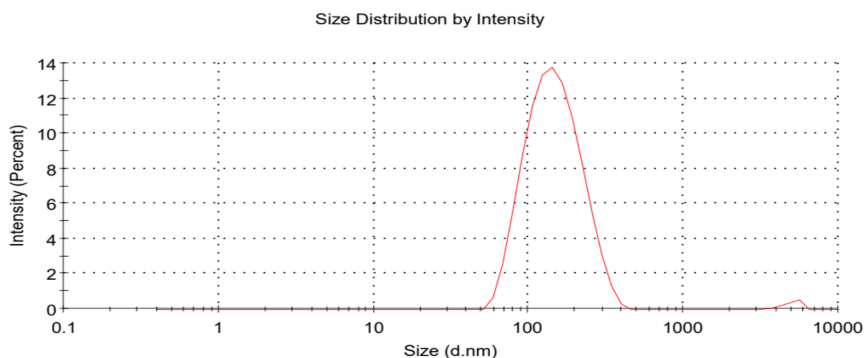
ECNPs**
2. **C7-3 CNPs**
3. **C7-3m1 CNPs**


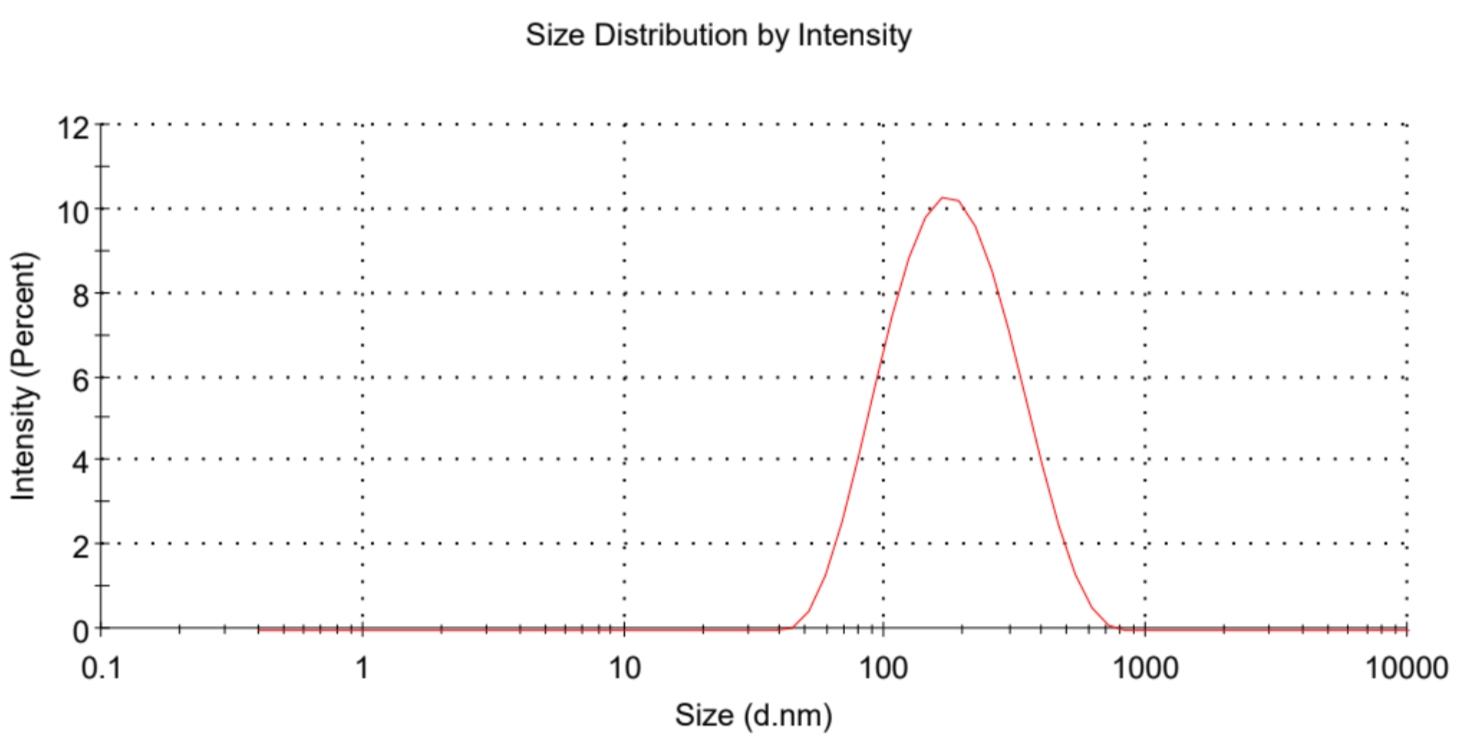


1. **
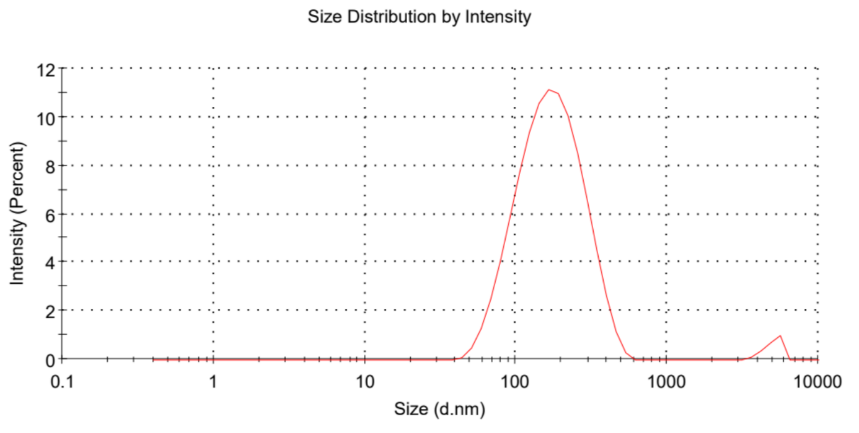
C7-3m2 CNPs**

Figure S1. The size distribution of ECNPs (A), C7-3 CNPs (B), C7-3m1 CNPs (C), and C7-3m2 CNPs (D).

1. **ECNPs**


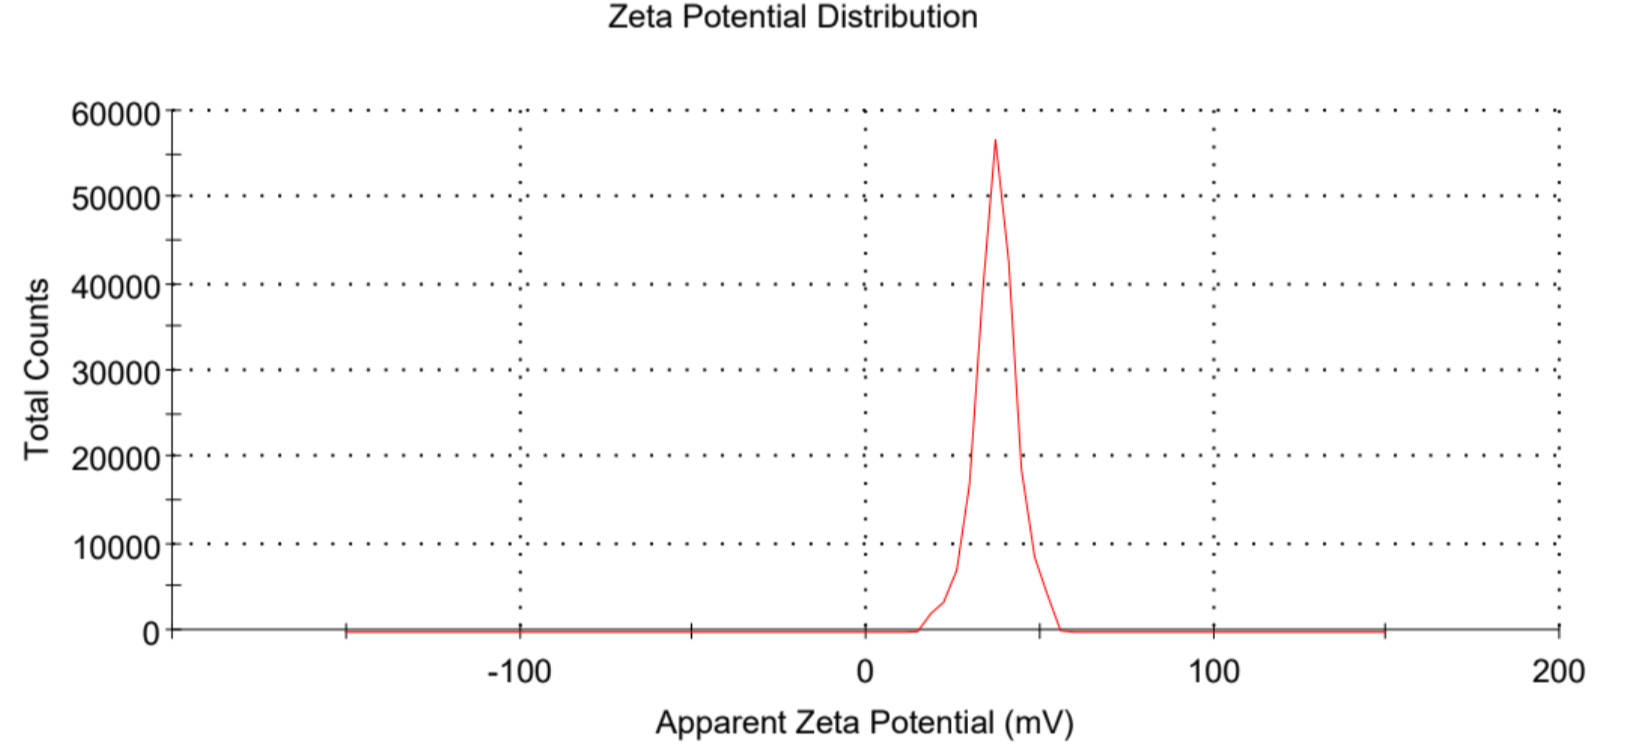


1. **
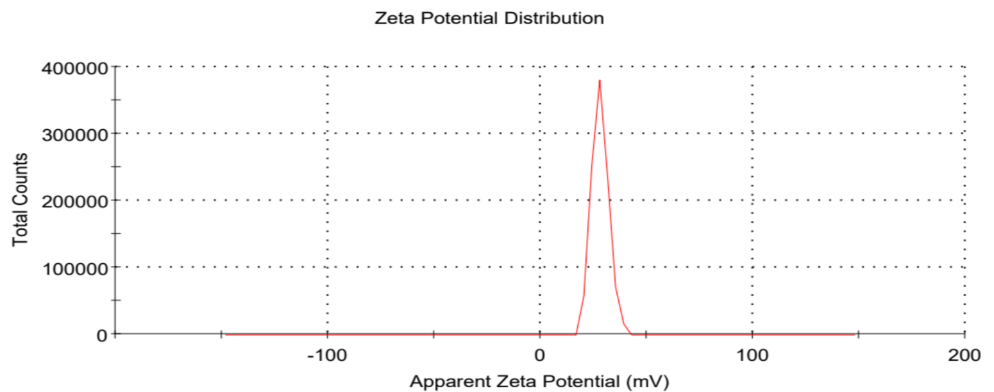
C7-3 CNPs**
2. **
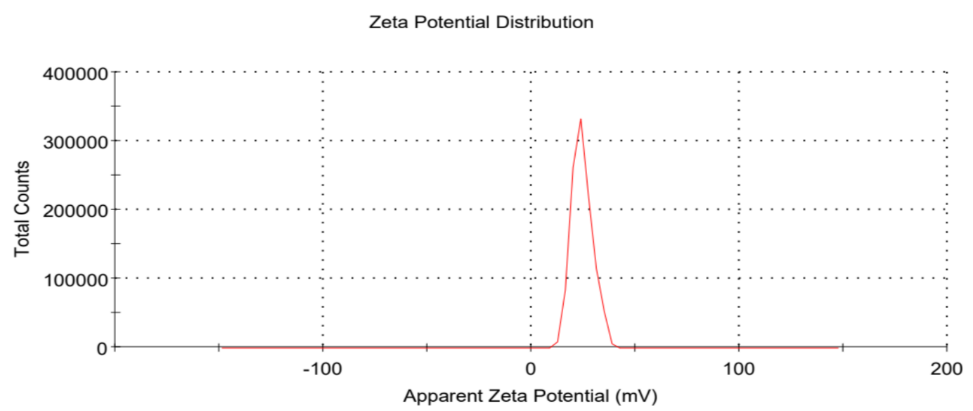
C7-3m1 CNPs**
3. **C7-3m2 CNPs**


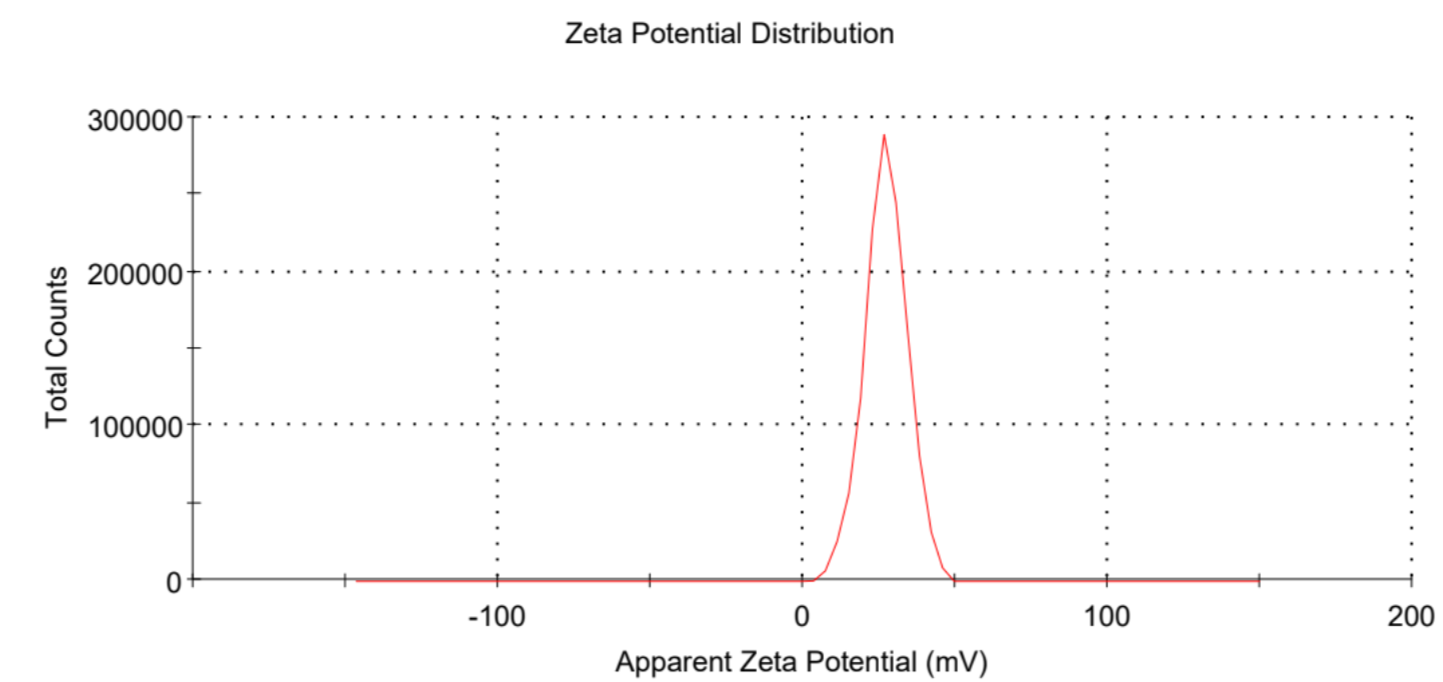


Figure S2. The zeta potential of ECNPs (A), C7-3 CNPs (B), C7-3m1 CNPs (C), and C7-3m2 CNPs (D).

Figure S3. The calibration curves of C7-3, C7-3m1, and C7-3m2 peptides using HPLC.
